# Supplementary material for: Association of Daily Step Patterns With Mortality in US Adults
Source: PubMed Central journal article supplement (PMC10051082; doi:10.1001/jamanetworkopen.2023.5174), 2023-03-28
Supplement: jamanetwopen-e235174-s002.pdf [file jamanetwopen-e235174-s002.pdf]

## Data Sharing Statement

Inoue. Association of Daily Step Patterns With Mortality in US Adults. *JAMA Netw Open*. Published March 28, 2023. doi:10.1001/jamanetworkopen.2023.5174

### Data

**Data available:** Yes

**Data types:** Deidentified participant data

**How to access data:** <https://www.cdc.gov/nchs/nhanes/index.htm>

**When available:** With publication

### Supporting Documents

**Document types:** None

### Additional Information

**Who can access the data:** anyone requesting the data

**Types of analyses:** for any purpose

**Mechanisms of data availability:** without investigator support

**Any additional restrictions:** The data is publicly available
